# Supplementary material
Source: PubMed Central journal article supplement (PMC556283)

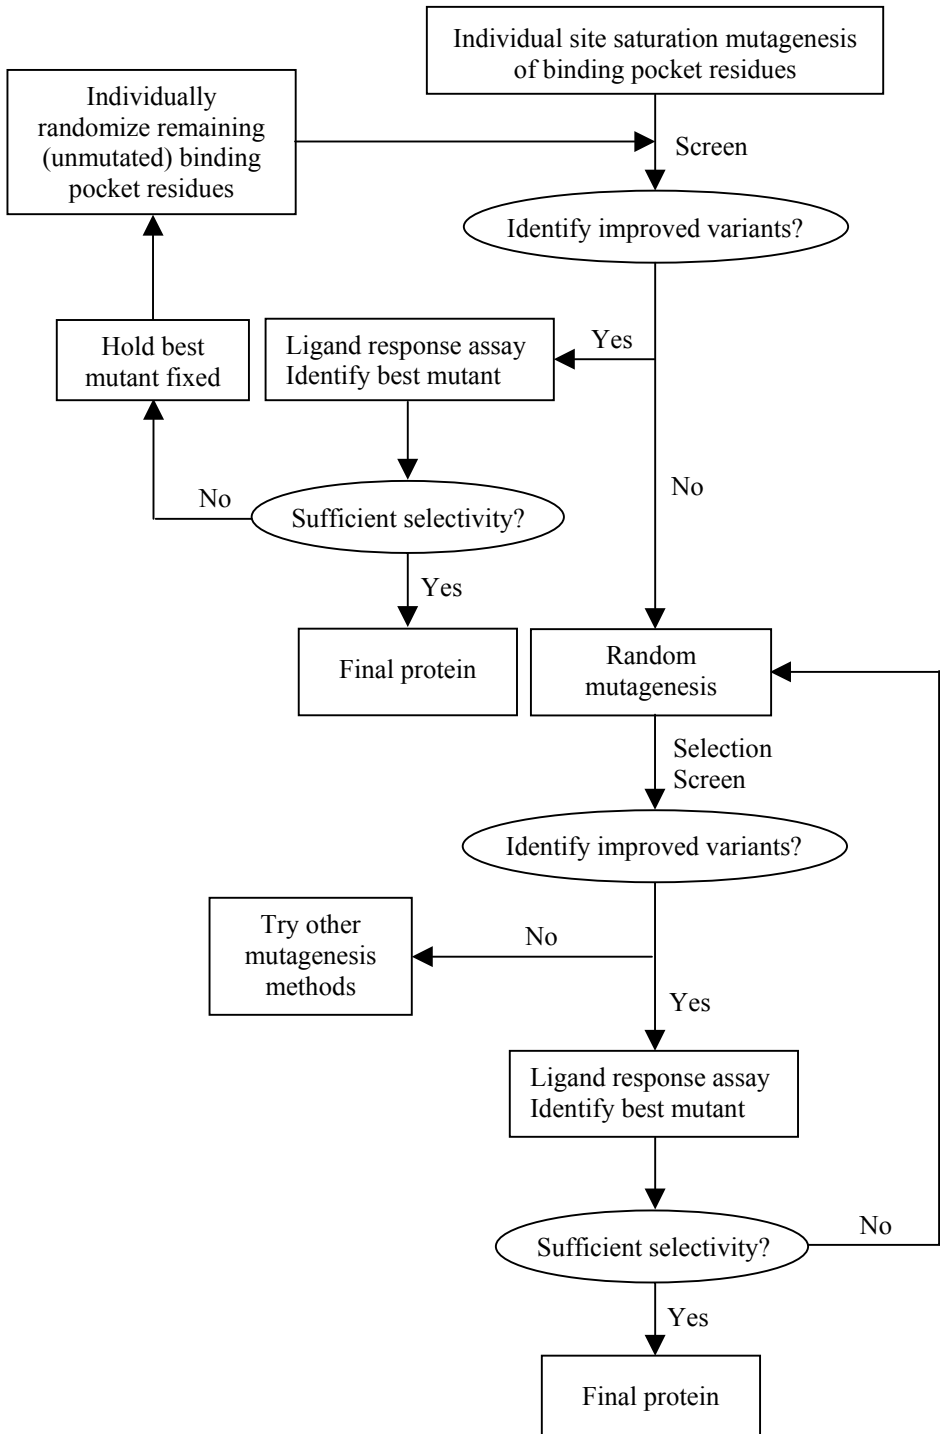

Supplement: pnas_102_16_5691__2.pdf [file pnas_102_16_5691__2.pdf]
